# Supplementary material for: Allele-Specific Methylation Links Non-Coding Variant of rs2280906 to MYOM2 Regulation in Schizophrenia
Source: Research Square preprint supplement (doi:10.21203/rs.3.rs-6970984/v1), 2025-07-21
Supplement: Supplementary file 1 [file c4bc6b085a2b34cf6da2c658.xlsx]

## Sheet: Table S1
Table S1 Detailed linkage information with the rs2280906 locus.
chr	pos (hg38)	LD (r²)	LD (D')	variant	Ref	Alt	AFR Freq	AMR Freq	ASN Freq	EUR Freq
8	2143143	1	1	rs142694372	A	C	0	0.01	0.02	0
8	2143146	1	1	rs186393892	T	C	0	0.01	0.02	0
8	2143182	1	1	rs117600698	A	C	0	0.01	0.02	0
8	2143272	1	1	rs139190380	A	G	0	0.01	0.02	0
8	2143308	1	1	rs2280906	A	G	0	0.01	0.02	0
8	2143394	1	1	rs2280907	G	A	0	0.01	0.02	0
8	2143417	1	1	rs2280908	C	T	0	0.01	0.02	0
8	2143420	1	1	rs2280909	C	T	0	0.01	0.02	0
8	2143525	1	1	rs143565098	G	A	0	0.01	0.02	0
8	2143530	1	1	rs146797850	G	A	0	0.01	0.02	0
8	2143591	1	1	rs143901180	T	TC	0.05	0.01	0.02	0

## Sheet: Table S2
Table S2 Regulatory motifs altered of rs2280908 - rs2280909 loci.
Position Weight Matrix ID (Library from Kheradpour and Kellis, 2013)	Strand	Ref	Alt	Match on:	Binding motif
				Ref: TTTCCCGTTGCAGATCGTGGCAGGTTGATCGGCGGCTTGCCTGACGTGGTGACCATCAT
				Alt: TTTCCCGTTGCAGATCGTGGCAGGTTGATTGGTGGCTTGCCTGACGTGGTGACCATCAT
AP-1_disc2	+	0.1	12.1	KCYSATTGGY
E2F_disc4	-	2.1	14.1	YGATTGGYYV
GATA_known11	+	1	13	RKSVDGATTRBNRN
Mrg1::Hoxa9_1	-	2.3	10.6	TGACAGKTTWAYGR
NF-Y_known3	-	-7	4.9	HYTGATTGGYTAVH
Pbx3_disc2	-	8.1	11.5	TGABTGRCAG
TLX1::NFIC	+	-7.7	4.2	TTGGCDHSSTGCCA
p53_2	-	10.6	11.5	DRRCWTGYYY

## Sheet: Table S3
Table S3 Primes designed for luciferase reporter gene assay, BS-PCR, knockout and EMSA.
Luciferase reporter gene assay
Name	Oligotosynthesise
rs145770325-XhoI-F	CCG CTCGAG TTCAAAAGGCCCATGTGCAG
rs145770325-HindIII-R	CCC AAGCTT ACAACTGCTTGTGTTGCTTCT
rs2280906-XhoI-F	CCG CTCGAG GCTTCATCGCTAGTGAGCCT
rs2280906-HindIII-R	CCC AAGCTT CACCTTCACACACGCAGGTA
rs55646807-KPNI-F	CGG GGTACC CAAATCAGTAGCACTGCTACACACC
rs55646807-XHOI-R	CCG CTCGAG GGCCAACATGGTGAAACCCCATCTC
rs117109793-NHEI-F	CTA GCTAGC ACGTATGTTTGCAGGAGGCTG
rs117109793-HINDIII-R	CCC AAGCTT GGCCAACAGAGGCTGCTTT
SLC2A6-XhoI-2F	CCGCTCGAGGCTGCTCTTCGTCTCAGGTA
SLC2A6-HindIII-2R	CCCAAGCTTATCACCCATCCCTTAACACCC
qPCR
Name	Oligotosynthesise
mMYOM2-F	ACTACGTGGACTGCTGTGTG
mMYOM2-F	CATAAGGATGGGACGGGACG
BS-PCR
Name	Oligotosynthesise
0906 BS PCR F1	ATTTTGGTATTTATTGTTGTTTATATGG
0906 BS PCR R1	AAACACAAAAACCCCTCACTAA
0906 BS PCR F2	TTTGGTATTTATTGTTGTTTATATGGT
0906 BS PCR R3	AAATAAAAACACAAAAACCCCTCACTA
Knockout & De-methylation
Name	Oligotosynthesise
0906 Assembly 3 FWD	CACCgATCGTGGCAGGTTGATCGG
0906 Assembly 3 REV	aaacCCGATCAACCTGCCACGATc
0906 Assembly 1 FWD	CACCgagttgggcagaaagtgacg
0906 Assembly 1 REV	aaaccgtcactttctgcccaactc
0906 Assembly 2 FWD	CACCggacacagaagcccctcact
0906 Assembly 2 REV	aaacagtgaggggcttctgtgtcc
EMSA
Name	Oligotosynthesise
0906-Ref.C-Fhot	TGGCAGGTTGATCGGCGGCTTGCCTGA
0906-Ref.C-Rhot	TCAGGCAAGCCGCCGATCAACCTGCCA
0906-Ref.C-Fcold	TGGCAGGTTGATCGGCGGCTTGCCTGA
0906-Ref.C-Rcold	TCAGGCAAGCCGCCGATCAACCTGCCA
0906-Alter.T-Fcold	TGGCAGGTTGATTGGTGGCTTGCCTGA
0906-Alter.T-Rcold	TCAGGCAAGCCACCAATCAACCTGCCA
5mC-0906Ref.C-Fhot	TGGCAGGTTGATCGGCGGCTTGCCTGA
5mC-0906Ref.C-Rhot	TCAGGCAAGCCGCCGATCAACCTGCCA
5mC-0906Ref.C-Fcold	TGGCAGGTTGATCGGCGGCTTGCCTGA
5mC-0906Ref.C-Rcold	TCAGGCAAGCCGCCGATCAACCTGCCA
